# Supplementary material
Source: publisher site journal article supplement (https://www.dovepress.com/article/562840)
Supplement: Supplementary file 1 [file 562840%20Supplemtary%20material%201%20.docx]

**Supplemetary material 1** The methodological quality assessment of the included studies

|  | Bojar et al., 2020 29 | Curtis et al., 2024 30 | Devore et al., 2014 31 | Diem et al., 2016 32 | Djonlagic et al., 2020 33 | Garcia et al., 2014 34 | Hestiantoro et al., 2019 35 | Chen et al., 2017 36 | Kimura et al., 2023 37 | Lambiase et al., 2014 38 | Legault et al., 2023 39 | Li et al., 2021 40 | Nascimento et al., 2022 41 | Rani et al., 2021 42 | Spira et al., 2017 43 | Swanson et al., 2020 44 | Thurston et al., 2024 45 | Unkenstein et al., 2016 46 | Wu et al., 2024 47 |
| --- | --- | --- | --- | --- | --- | --- | --- | --- | --- | --- | --- | --- | --- | --- | --- | --- | --- | --- | --- |
| REPORTING | | | | | | | | | | | | | | | | | | | |
| Q1 | 1 | 1 | 1 | 1 | 1 | 1 | 1 | 1 | 1 | 1 | 1 | 1 | 1 | 1 | 1 | 1 | 1 | 1 | 1 |
| Q2 | 1 | 1 | 1 | 1 | 1 | 1 | 1 | 1 | 1 | 1 | 1 | 1 | 1 | 1 | 1 | 1 | 1 | 1 | 1 |
| Q3 | 1 | 1 | 1 | 1 | 1 | 1 | 1 | 1 | 1 | 1 | 1 | 1 | 1 | 1 | 1 | 1 | 1 | 1 | 1 |
| Q5 | 0 | 1 | 1 | 0 | 1 | 1 | 0 | 1 | 0 | 0 | 0 | 1 | 1 | 0 | 1 | 1 | 0 | 0 | 1 |
| Q6 | 1 | 1 | 1 | 1 | 1 | 1 | 1 | 1 | 1 | 1 | 1 | 1 | 1 | 1 | 1 | 1 | 1 | 1 | 1 |
| Q7 | 1 | 1 | 1 | 1 | 1 | 1 | 1 | 1 | 1 | 1 | 1 | 1 | 1 | 1 | 1 | 1 | 1 | 1 | 1 |
| Q9 | UTD | UTD | 0 | UTD | 0 | UTD | UTD | 0 | 1 | UTD | 1 | UTD | 0 | UTD | UTD | UTD | UTD | 1 | UTD |
| Q10 | 1 | 1 | 1 | 1 | 1 | 1 | 1 | 1 | 1 | 0 | 0 | 1 | 1 | 0 | 1 | 1 | 1 | 1 | 1 |
| EXTERNAL VALIDITY | | | | | | | | | | | | | | | | | | | |
| Q11 | 1 | 0 | 0 | 0 | UTD | 0 | 0 | 0 | 0 | 0 | UTD | 1 | 0 | 1 | 0 | UTD | UTD | UTD | 1 |
| Q12 | UTD | 0 | 1 | UTD | UTD | 0 | UTD | 0 | 0 | UTD | UTD | UTD | UTD | 1 | 0 | UTD | UTD | UTD | UTD |
| Q13 | UTD | UTD | UTD | UTD | 0 | UTD | UTD | UTD | UTD | UTD | UTD | UTD | 0 | UTD | UTD | UTD | UTD | 0 | UTD |
| INTERNAL VALIDITY; BIAS; CONFOUNDING | | | | | | | | | | | | | | | | | | | |
| Q14 | UTD | UTD | UTD | UTD | UTD | UTD | UTD | UTD | UTD | UTD | UTD | UTD | 0 | UTD | UTD | UTD | UTD | UTD | UTD |
| Q15 | UTD | 0 | 0 | 1 | 1 | 0 | 0 | 0 | 0 | 0 | UTD | 0 | 1 | 0 | UTD | 0 | 0 | UTD | 0 |
| Q18 | 1 | 1 | 1 | 1 | 1 | 1 | 1 | 1 | 1 | 1 | 1 | 1 | 1 | 1 | 1 | 1 | 1 | 1 | 1 |
| Q20 | 1 | 1 | 1 | 1 | 1 | 1 | 1 | 1 | 1 | 1 | 1 | 1 | 1 | 0 | 1 | 1 | 1 | 1 | 1 |
| Q21 | 1 | 1 | 1 | 1 | 1 | 1 | 1 | 1 | 1 | 1 | UTD | 1 | 1 | 1 | 1 | 1 | 1 | UTD | 1 |
| Q22 | 1 | 1 | 1 | 1 | 1 | 1 | 1 | 1 | 1 | 1 | UTD | 1 | 1 | 1 | 1 | 1 | 1 | UTD | 1 |
| Q26 | 1 | UTD | 0 | 0 | 0 | UTD | UTD | 1 | 0 | UTD | 1 | UTD | 0 | UTD | UTD | UTD | UTD | 0 | UTD |
| POWER | | | | | | | | | | | | | | | | | | | |
| Q27 | UTD | 1 | 0 | 0 | UTD | 0 | 0 | 0 | UTD | UTD | UTD | 0 | 1 | 0 | 0 | 0 | 1 | UTD | 1 |
| Total score | 12 | 12 | 12 | 12 | 12 | 11 | 10 | 12 | 11 | 9 | 9 | 12 | 13 | 10 | 11 | 11 | 10 | 9 | 13 |
| Kennelly score (%) | **66,7** | **75,0** | **85,7** | **80,0** | **75,0** | **73,3** | **66,7** | **85,7** | **78,6** | **60,0** | **52,9** | **70,6** | **92,8** | **71,4** | **68,8** | **64,7** | **58,9** | **56,3** | **72,2** |
